# Supplementary material for: Tuning the electronic properties of phenazine and bisphenazine derivatives: a theoretical and experimental investigation
Source: Royal Society of Chemistry journal article supplement (doi:10.1039/c0cp00836b), 2010-01-01
Supplement: c0cp00836b.pdf [file c0cp00836b.pdf]

**Supplementary Information for:**  
**Tuning the Electronic Properties of Phenazine and Bisphenazine Derivatives: A**  
**Theoretical and Experimental Investigation**

*Kathleen A. Robins,\* Kyoungmi Jang, Bin Cao, and Dong-Chan Lee\**

Department of Chemistry, University of Nevada Las Vegas, 4505 S. Maryland Pkwy, Las Vegas,  
Nevada 89154-4003

**Table of Contents**

|                                                                                                                                                                |    |
|----------------------------------------------------------------------------------------------------------------------------------------------------------------|----|
| 1. General Instrumentation                                                                                                                                     | S2 |
| 2. Synthesis and characterization of compounds<br><b>P-Cl<sub>C</sub></b> , <b>BP-Cl<sub>A</sub></b> , <b>BP-Cl<sub>C</sub></b> , and <b>BP-Br<sub>A</sub></b> | S2 |
| 3. UV-vis spectra of <b>BP-Cl<sub>A</sub></b> and <b>BP-Br<sub>A</sub></b> in CHCl <sub>3</sub> .                                                              | S4 |
| 4. References                                                                                                                                                  | S4 |

**General Instrumentation:** Nuclear magnetic resonance (NMR) spectra were obtained with a Varian Gemini 400 MHz NMR spectrometer at room temperature. Deuterated chloroform ( $\text{CDCl}_3$ ) containing tetramethylsilane (TMS) as internal standard was used as the solvent for both  $^1\text{H}$  NMR and  $^{13}\text{C}$  NMR. The low resolution (LR)-EI, LR-ESI, and LR-MALDI mass spectra were recorded at the University of Illinois at Chicago. Optical properties of the molecules were obtained with Shimadzu UV-2450 UV-visible spectrophotometer. Electrochemistry measurements were performed with CV on a CH instrument 660C with a three electrode configuration, with a cell equipped with a platinum plate as the counter electrode, a platinum disc as the working electrode (2 mm diameter), and a non aqueous  $\text{Ag}/\text{Ag}^+$  electrode (Ag in 10 mM  $\text{AgNO}_3$  solution in acetonitrile) as the reference electrode. CV measurements for all compounds were recorded in methylene chloride solution containing 0.1 M tetrabutylammonium hexafluorophosphate ( $\text{TBAPF}_6$ ) as the supporting electrolyte. All solutions were purged with Ar for 15 - 20 min before each experiment, and a blanket of Ar gas was used during the experiments. The scan rate ( $v$ ) was adjusted to 100 mV/s for all experiments. All potentials were calibrated to the ferrocene/ferrocenium ( $\text{Fc}/\text{Fc}^+$ ) redox couple.

**Synthesis and characterization of compounds:** All chemicals and solvents were purchased from commercial source and used as received without further purification. Compounds **P-H<sub>C</sub>**,<sup>1</sup> **P-F<sub>A</sub>**,<sup>1</sup> **P-Cl<sub>A</sub>**,<sup>1</sup> **P-Br<sub>A</sub>**,<sup>1</sup> **P-Br<sub>B</sub>**,<sup>1</sup> **BP-H<sub>C</sub>**,<sup>2</sup> **BP-F<sub>A</sub>**,<sup>2</sup> **BP-Br<sub>B</sub>**,<sup>3</sup> **BP-NO<sub>2A</sub>**,<sup>2</sup> and 1,2-diamino-4,5-dibromobenzene<sup>4</sup> were synthesized according to the literature procedures.

***P-Cl<sub>C</sub>*** To a suspension of 1,2-dinitrotetrachlorobenzene (500 mg, 1.64 mmol) in 20 mL absolute ethanol and 5 mL HCl was added tin powder (660 mg, 5.56 mmol). The mixture was stirred for 3 hr at room temperature and the mixture was warmed to 45 °C for additional 1.5 hr with stirring. The resulting reaction mixture was poured into ethyl acetate, and saturated  $\text{NaHCO}_3$  was added followed by 0.5 M  $\text{Na}_2\text{S}$  solution. The separated organic layer was dried over sodium sulfate ( $\text{Na}_2\text{SO}_4$ ), and filtered with ethyl acetate. The remaining solvent was removed under vacuum. By evaporating solvent, white crystal was obtained and the obtained 1,2-diamino-3,4,5,6-tetrachlorobenzene was used for next reaction without any further purification (yield: 95%). 1,2-Diamino-3,4,5,6-tetrachlorobenzene (385 mg, 1.57 mmol) was dissolved in 30 mL absolute ethanol. 2,5-Dihydroxy-1,4-benzoquinone (220 mg, 1.57 mmol) was added at once and the mixture was refluxed for 24 hours under a positive  $\text{N}_2$  flow. After evaporating the solvent, without purification of the intermediate, the crude solid was dissolved in 30 mL *N,N*-dimethylformamide (DMF), followed by addition of potassium carbonate ( $\text{K}_2\text{CO}_3$ ) (760 mg, 5.50 mmol). Then bromodecane (0.98 mL, 4.71 mmol) was added and the mixture was maintained at 60 °C. During reaction, same amount of  $\text{K}_2\text{CO}_3$  and bromodecane was added twice by following TLC result for 5 days with continuous stirring. The mixture was cooled down to room temperature and poured into  $\text{H}_2\text{O}$ , filtered and washed thoroughly with  $\text{H}_2\text{O}$ . It was then dried over anhydrous sodium sulfate. The product was purified by silica gel column chromatography ( $\text{CH}_2\text{Cl}_2/\text{Hexane}$  1/2 v/v). The pure product was obtained as a yellow solid. (Two-step yield: 12%).  $^1\text{H}$  NMR ( $\text{CDCl}_3$ )  $\delta$  7.45 (s, 2H), 4.25 (t, 4H,  $J = 6.6$  Hz), 1.97 (m, 4H), 1.5-1.2 (m, 28H), 0.89 (t, 6H,  $J = 6.8$  Hz).  $^{13}\text{C}$  NMR ( $\text{CDCl}_3$ )  $\delta$  156.14, 142.54, 137.16, 132.01, 130.80, 105.46, 69.75, 31.93, 29.61, 29.57, 29.35, 29.33, 28.71, 26.00, 22.70, 14.12. LR-EI-MS calcd for  $\text{C}_{32}\text{H}_{44}\text{Cl}_4\text{N}_2\text{O}_2$   $m/z = 628.22$ , found  $m/z = 628.39$   $[\text{M}]^+$

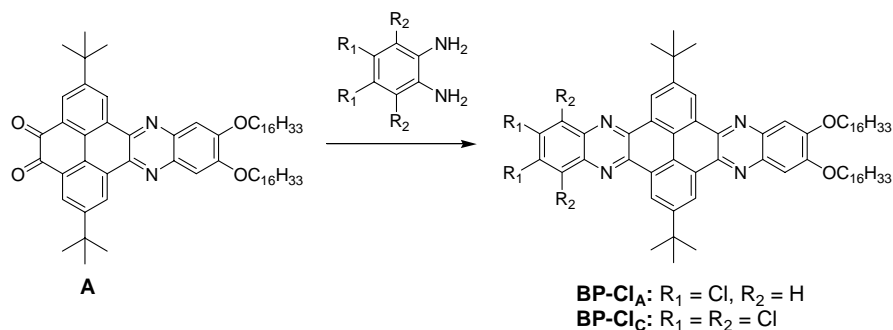

**BP-Cl<sub>A</sub>** The intermediate **A**<sup>2,3</sup> (190 mg, 0.21 mmol) was dissolved in 40 mL chloroform (CHCl<sub>3</sub>) and 10 mL acetic acid (AcOH). To that solution, 1,2-diamino-4,5-dichlorobenzene (40 mg, 0.23 mmol) was added. The reaction mixture was refluxed overnight under a positive N<sub>2</sub> flow. After cooling it to room temperature, the reaction mixture was extracted with H<sub>2</sub>O and 10% aqueous sodium hydroxide (NaOH) solution. The organic layer was dried over Na<sub>2</sub>SO<sub>4</sub>, and filtered with hot CHCl<sub>3</sub>. The remaining solvent was removed under vacuum. The crude product was purified by silica gel column chromatography (eluent: CH<sub>2</sub>Cl<sub>2</sub>/hexane 1/3 to 1/1) to give the pure product as a yellow solid (yield: 55%). <sup>1</sup>H NMR (CDCl<sub>3</sub>) δ 9.73 (d, 2H, *J* = 2 Hz), 9.64 (d, 2H, *J* = 2 Hz), 8.50 (s, 2H), 7.58 (s, 2H), 4.32 (t, 4H, *J* = 6.8 Hz), 2.02 (m, 4H), 1.75 (s, 18H), 1.61 (m, 4H), 1.5-1.2 (m, 48H), 0.88 (t, 6H, *J* = 6.8 Hz). <sup>13</sup>C NMR (CDCl<sub>3</sub>) δ 153.34, 150.55, 143.89, 140.61, 140.03, 139.95, 133.95, 129.75, 129.64, 128.47, 125.08, 124.26, 123.77, 106.81, 69.21, 35.88, 31.95, 31.91, 29.78, 29.75, 29.71, 29.51, 29.40, 28.99, 26.14, 22.71, 14.13 (5 aliphatic peaks not seen due to overlapping signals). LR-MALDI-MS calcd for C<sub>68</sub>H<sub>92</sub>Cl<sub>2</sub>N<sub>4</sub>O<sub>2</sub> *m/z* = 1066.66, found *m/z* = 1066.95 [M]<sup>+</sup>

**BP-Cl<sub>C</sub>** The intermediate **A** (296 mg, 0.32 mmol) was dissolved in 20 mL CHCl<sub>3</sub> and 5 mL AcOH. To that solution, 1,2-diamino-3,4,5,6-tetrachlorobenzene (80 mg, 0.333 mmol) was added. The reaction mixture was refluxed overnight under a positive N<sub>2</sub> flow. After cooling it to room temperature, the reaction mixture was extracted with H<sub>2</sub>O and 10% aqueous NaOH solution. The organic layer was dried over Na<sub>2</sub>SO<sub>4</sub>, and filtered with hot CHCl<sub>3</sub>. The remaining solvent was removed under vacuum. The crude product was purified by silica gel column chromatography (eluent: CH<sub>2</sub>Cl<sub>2</sub>/hexane 1/3) to give the pure product as a yellow solid (yield: 67%). <sup>1</sup>H NMR (CDCl<sub>3</sub>) δ 9.78 (d, 2H, *J* = 2 Hz), 9.75 (d, 2H, *J* = 2 Hz), 7.59 (s, 2H), 4.33 (t, 4H, *J* = 6.8 Hz), 2.03 (m, 4H), 1.76 (s, 18H), 1.61 (m, 4H), 1.5-1.2 (m, 48H), 0.88 (t, 6H, *J* = 7 Hz). <sup>13</sup>C NMR (CDCl<sub>3</sub>) δ 153.43, 150.82, 144.03, 140.00, 139.89, 137.56, 133.15, 131.62, 129.80, 127.88, 125.36, 125.05, 124.38, 106.81, 69.24, 35.83, 31.95, 31.82, 29.77, 29.75, 29.70, 29.49, 29.39, 28.98, 26.14, 22.71, 14.13 (5 aliphatic peaks not seen due to overlapping signals). LR-ESI-MS calcd for C<sub>68</sub>H<sub>90</sub>Cl<sub>4</sub>N<sub>4</sub>O<sub>2</sub> *m/z* = 1134.58, found *m/z* = 1135.6 [M+H]<sup>+</sup> LR-MALDI-MS calcd for C<sub>68</sub>H<sub>90</sub>Cl<sub>4</sub>N<sub>4</sub>O<sub>2</sub> *m/z* = 1134.58, found *m/z* = 1134.86 [M]<sup>+</sup>

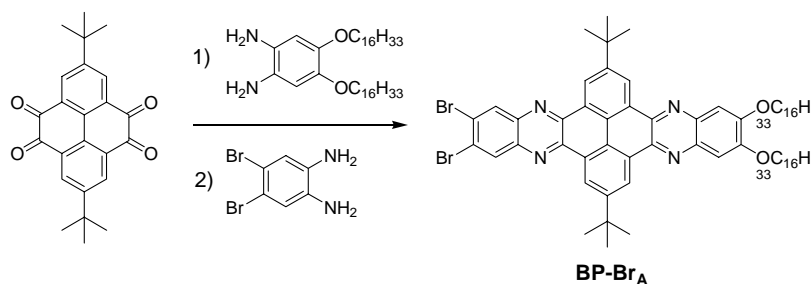

**BP-Br<sub>A</sub>** 2,7-Di-*tert*-butylpyrene-4,5,9,10-tetraone (414 mg, 1.11 mmol) was suspended in 261 mL CHCl<sub>3</sub> and 89 mL AcOH. To that mixture, 1,2-bis(hexadecyloxy)-4,5-diaminobenzene (579 mg, 0.99 mmol) was added at once. The reaction mixture was refluxed under a positive N<sub>2</sub> flow. After 2 hours, 1,2-diamino-4,5-dibromobenzene (322 mg, 1.2 mmol) was added into the reaction mixture and the mixture was refluxed for an additional 2 hours under a positive N<sub>2</sub> flow. After cooling it to room temperature, the reaction mixture was extracted with water to remove AcOH, and the organic layer was neutralized by saturated sodium bicarbonate (NaHCO<sub>3</sub>) solution. The organic layer was then dried over Na<sub>2</sub>SO<sub>4</sub>, and the solvent was evaporated after filtration. The crude material was purified by silica gel column chromatography (eluent: chloroform/hexane 1/3 to 1/1) to give the pure product as a yellow solid (Two-step yield: 25%). <sup>1</sup>H NMR (CDCl<sub>3</sub>) δ 9.76 (d, 2H, *J* = 2.4 Hz), 9.67 (d, 2H, *J* = 2.0 Hz), 8.75 (s, 2H), 7.62 (s, 2H), 4.33 (t, 4H, *J* = 6.6 Hz), 2.03 (m, 4H), 1.75 (s, 18H), 1.61 (m, 4H), 1.5-1.2 (m, 48H), 0.88 (t, 6H, *J* = 6.8 Hz). <sup>13</sup>C NMR (CDCl<sub>3</sub>) δ 153.42, 150.66, 144.07, 141.16, 140.11, 140.02, 133.26, 129.73, 128.57, 126.03, 125.20, 124.35, 123.88, 106.86, 69.25, 35.88, 31.94, 31.90, 29.76, 29.75, 29.69, 29.49, 29.39, 28.99, 26.14, 22.71, 14.13 (5 aliphatic peaks not seen due to overlapping signals). LR-MALDI-MS calcd for C<sub>68</sub>H<sub>92</sub>Br<sub>2</sub>N<sub>4</sub>O<sub>2</sub> *m/z* = 1154.56, found *m/z* = 1154.92 [M]<sup>+</sup>

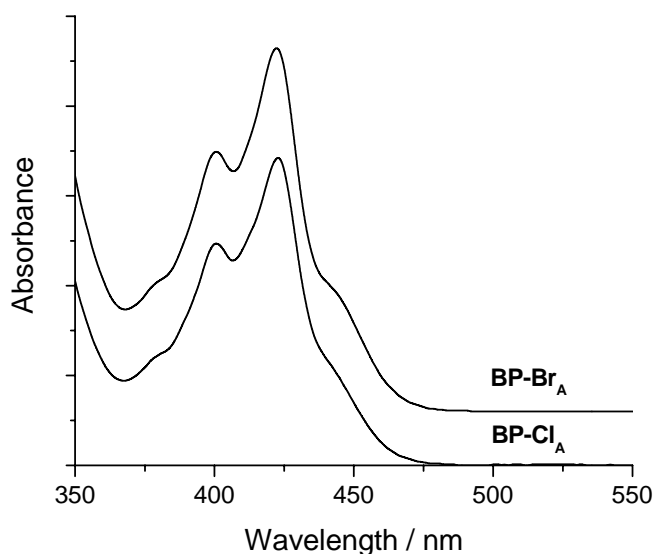

Figure S1. UV-vis spectra of **BP-Cl<sub>A</sub>** and **BP-Br<sub>A</sub>** in CHCl<sub>3</sub>.

## References

1. D.-C. Lee, B. Cao, K. Jang and P. M. Foster, *J. Mater. Chem.*, 2010, **20**, 867-873.
2. K. K. McGrath, K. Jang, K. A. Robins and D.-C. Lee, *Chem. Eur. J.*, 2009, **15**, 4070-4077.

3. D.-C. Lee, K. Jang, K. K. McGrath, R. Uy, K. A. Robins and D. W. Hatchett, *Chem. Mater.*, 2008, **20**, 3688-3695.
4. G. W. H. Cheeseman, *J. Chem. Soc.*, 1962, 1170-1176.
